# Supplementary material for: Fibroblast Growth Factor 21 is Related to Atherosclerosis Independent of Nonalcoholic Fatty Liver Disease and Predicts Atherosclerotic Cardiovascular Events
Source: PubMed Central journal article supplement — J Am Heart Assoc. 2020 Jun 18;9(11):e015226. doi: 10.1161/JAHA.119.015226 (PMC7428997; doi:10.1161/jaha.119.015226), 2020-06-18
Supplement: JAH3-9-e015226-s001.pdf [file JAH3-9-e015226-s001.pdf]

# **SUPPLEMENTAL MATERIAL**

**Table S1. Association between serum FGF21 levels and clinical parameters.**

|              | n   | FGF21 level, pg/ml  | P value |
|--------------|-----|---------------------|---------|
| Ever smoker  |     |                     | 0.119   |
| yes          | 137 | 233.9 (113.3-405.5) | -       |
| no           | 234 | 227.4 (122.2-407.8) | -       |
| Dyslipidemia |     |                     | <0.001  |
| yes          | 215 | 303.1 (154.1-459.7) | -       |
| no           | 156 | 168.2 (93.1-295.5)  | -       |
| Hypertension |     |                     | 0.017   |
| yes          | 153 | 268.0 (136.0-440.3) | -       |
| no           | 218 | 208.9 (107.4-374.2) | -       |

Data are presented as median (interquartile range).

FGF21, fibroblast growth factor 21.

**Table S2. Absolute difference related to the increase of one standard deviation of FGF21 level.**

| Variables           | B (95% CI)                     | P Value          |
|---------------------|--------------------------------|------------------|
| Waist circumference | 0.001 (-0.015, 0.016)          | 0.918            |
| C-IMT               | -0.063 (-0.679, 0.552)         | 0.840            |
| SBP                 | -0.001 (-0.008, 0.006)         | 0.744            |
| DBP                 | -0.002 (-0.014, 0.011)         | 0.778            |
| FBG                 | -0.014 (-0.051, 0.023)         | 0.459            |
| 2hBG                | -0.004 (-0.026, 0.017)         | 0.702            |
| Fasting insulin     | -0.004 (-0.012, 0.003)         | 0.272            |
| HOMA-IR             | -0.007 (-0.025, 0.010)         | 0.422            |
| Triglycerides       | <b>0.477 (0.336, 0.617)</b>    | <b>&lt;0.001</b> |
| Total cholesterol   | 0.072 (-0.023, 0.168)          | 0.135            |
| HDL-C               | <b>-0.650 (-0.976, -0.324)</b> | <b>&lt;0.001</b> |
| LDL-C               | 0.080 (-0.033, 0.193)          | 0.166            |
| hsCRP               | -0.003 (-0.012, 0.006)         | 0.520            |

Regression coefficient (B): absolute changes in the variables associated with one standard deviation increase in ln-transformed FGF21 level.

Adjusted for age and BMI.

2hBG, 2-hour blood glucose; BMI, body mass index; C-IMT, carotid intima-media thickness; DBP, diastolic blood pressure; FGF21, fibroblast growth factor 21; HDL-C, high-density lipoproteins cholesterol; HOMA-IR, homeostatic model assessment for insulin resistance index; hsCRP, high-sensitivity C-reactive protein; LDL-C, low-density lipoprotein cholesterol; SBP, systolic blood pressure.

**Table S3. Absolute difference related to the increase of one standard deviation of FGF21 level at baseline.**

| Variables           | B (95%CI)                      | P Value          |
|---------------------|--------------------------------|------------------|
| Waist circumference | 0.010 (-0.003, 0.023)          | 0.122            |
| SBP                 | 0.004 (0.000, 0.009)           | 0.053            |
| DBP                 | 0.006 (-0.002, 0.014)          | 0.128            |
| FBG                 | 0.000 (-0.049, 0.049)          | 0.990            |
| 2hBG                | 0.035 (0.005, 0.065)           | 0.024            |
| HOMA-IR             | 0.038 (-0.04, 0.115)           | 0.341            |
| HbA1c               | 0.046 (-0.026, 0.118)          | 0.211            |
| Triglycerides       | <b>0.116 (0.071, 0.162)</b>    | <b>&lt;0.001</b> |
| Total cholesterol   | 0.059 (-0.017, 0.135)          | 0.128            |
| HDL-C               | <b>-0.532 (-0.739, -0.325)</b> | <b>&lt;0.001</b> |
| LDL-C               | 0.001 (-0.09, 0.092)           | 0.986            |
| eGFR                | -0.002 (-0.005, 0.001)         | 0.262            |
| hsCRP               | 0.004 (-0.032, 0.039)          | 0.836            |
| Lipocalin-2         | 0.005 (-0.002, 0.012)          | 0.196            |

Regression coefficient (B): absolute change in the variables associated with one standard deviation increase in ln-transformed FGF21 level.

Adjusted for age and BMI.

2hBG, 2-hour blood glucose; BMI, body mass index; C-IMT, carotid intima-media thickness; DBP, diastolic blood pressure; FGF21, fibroblast growth factor 21; HDL-C, high-density lipoproteins cholesterol; HOMA-IR, homeostatic model assessment for insulin resistance index; hsCRP, high-sensitivity C-reactive protein; LDL-C, low-density lipoprotein cholesterol; SBP, systolic blood pressure.

**Figure S1. Flow chart of the prospective study population.**

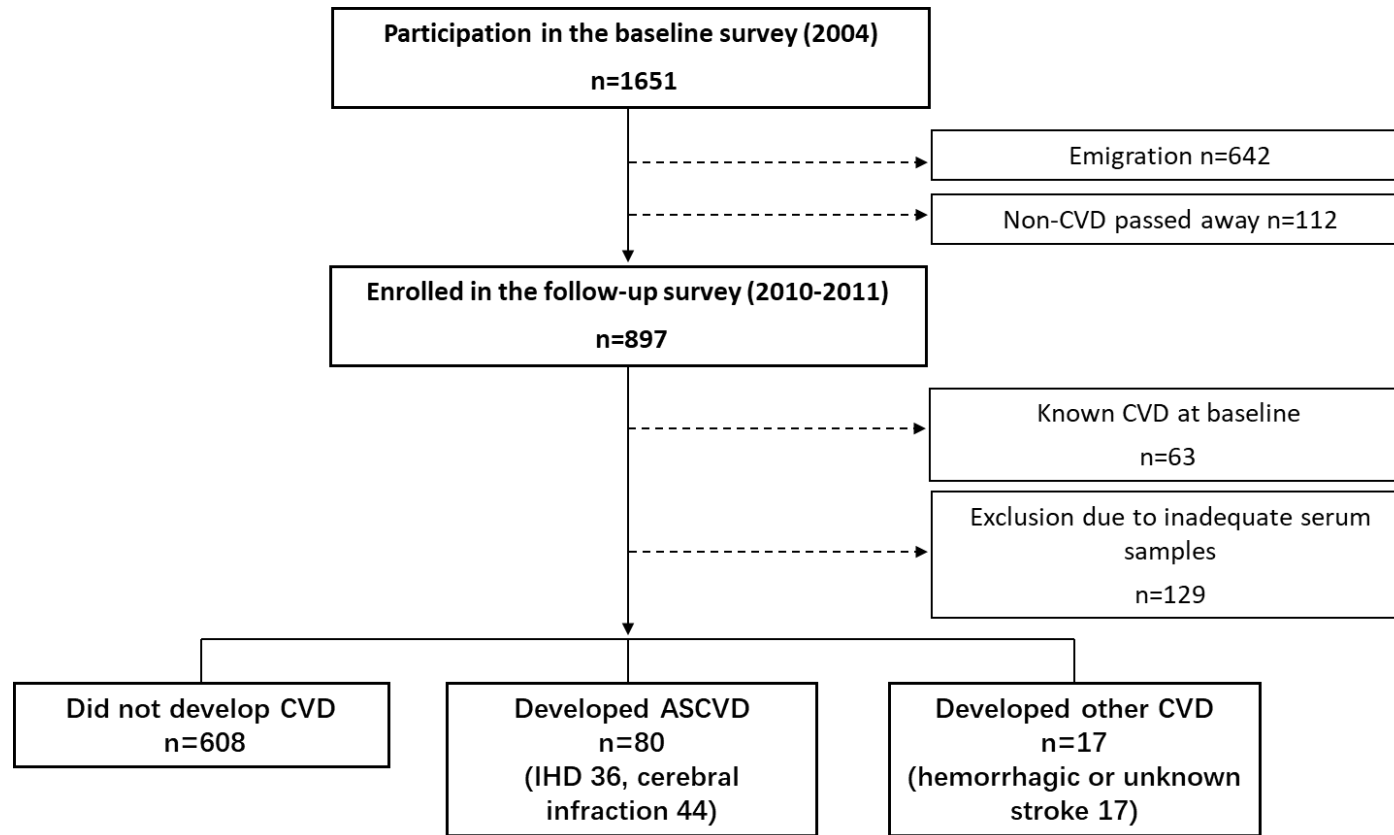

ASCVD, atherosclerotic cardiovascular disease. CVD, cardiovascular disease.
